# Supplementary material
Source: Springer Nature journal article supplement (https://www.springermedizin.de/resource/supplementary/12984_2011_425_MOESM11_ESM.pdf/9605974)

Original Map

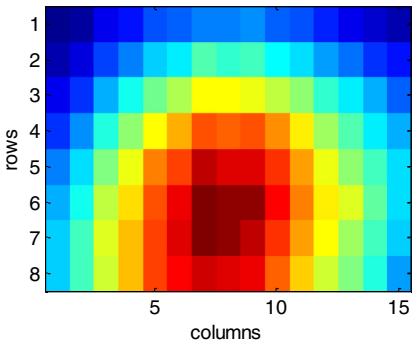

Topographical View

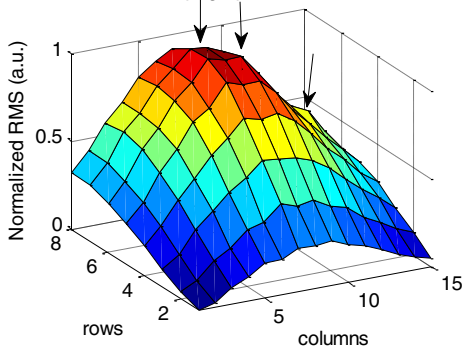

H-dome Segmentation

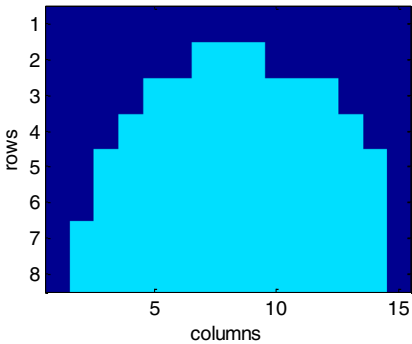

Watershed Segmentation

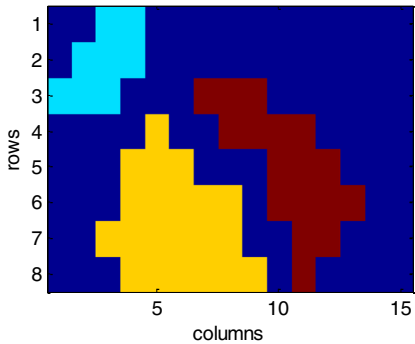

Supplement: MOESM11 [file 9605974]
